# Supplementary material for: A study on factors influencing cross and self product selectivity in aldol condensation over propylsulfonic acid functionalized silica
Source: Royal Society of Chemistry journal article supplement (doi:10.1039/c3cy20613k), 2013-01-01
Supplement: c3cy20613k.pdf [file c3cy20613k.pdf]

## **Electronic Supplementary Information**

### **A study on factors influencing cross and self products selectivity in aldol condensation over propylsulfonic acid functionalized silica**

Kamlesh N. Tayade, Manish Mishra\*

Department of Chemical Engineering And Shah-Schulman Center for Surface Science and  
Nanotechnology, Faculty of Technology, Dharmsinh Desai University,  
College Road, Nadiad – 387 001, Gujarat, India,

\*E-mail: [manishorgch@gmail.com](mailto:manishorgch@gmail.com); Fax: +91 268 2520501; Tel.: +91 268 2520502

#### **Calculation of *n*-heptanal conversion:**

The conversion of *n*-heptanal was calculated on the basis of its weight percent; the initial theoretical weight percent of *n*-heptanal ( $100 \times \text{wt. of } n\text{-heptanal} / \text{wt. of } n\text{-heptanal} + \text{wt. of benzaldehyde}$ ) was divided by initial GC peak area to get the response factor. Final unreacted weight percent of *n*-heptanal remained in the reaction mixture was calculated by multiplying the response factor with the GC peak area for *n*-heptanal after the reaction.

Conversion (%) of *n*-heptanal =  $100 \times [\text{Initial wt.\% of } n\text{-heptanal} - \text{Final wt.\% of } n\text{-heptanal}] / \text{Initial wt.\% of } n\text{-heptanal}$ .

#### **Capping of surface silanols of SFS-3 catalyst**

The capping of surface silanols of SFS-3 catalyst was carried out by reaction of *iso*-butyl trimethoxy silane with silanols. SFS-3 catalyst was dried at 100 °C for 1 h as pre-treatment prior to functionalization. The pre-treated 1 g SFS-3 catalyst was suspended in 15 mL toluene and 0.045g (0.25mmol) *iso*-butyl trimethoxy silane (Aldrich, 97%) was added in the solution under stirring. The reaction mass was kept at 100°C for 24h under nitrogen atmosphere with continuous stirring. The solid was filtered, washed with toluene and dried at 120°C for 14 h.

The modified SFS-3 catalyst was named as CSFS-3. The surface Brønsted acidity of CSFS-3 was determined by titration of the sample protons and was found to be 0.41 mmol/ g.

**Table 1S. CHS and TGA weight loss data of SFS samples.**

| Sample | C, H, S content (wt.%) | S content (mmol/ g) <sup>a</sup> | Weight losses in different temperature range in TGA analysis and amount of S species |                       |                          |                       |                          |
|--------|------------------------|----------------------------------|--------------------------------------------------------------------------------------|-----------------------|--------------------------|-----------------------|--------------------------|
|        |                        |                                  | 40-120°C (H <sub>2</sub> O loss; wt.%)                                               | 330-430°C (PrSH loss) |                          | 430-580°C (PrSA loss) |                          |
|        |                        |                                  |                                                                                      | wt. %                 | mmol PrSH/g <sup>b</sup> | wt. %                 | mmol PrSA/g <sup>c</sup> |
| SG     | -                      | -                                | 10.7                                                                                 | -*                    | -                        | -*                    | -                        |
| SFS-1  | 0.786, 0.632, 0.398    | 0.124                            | 20.3                                                                                 | -*                    | -                        | 2.30                  | 0.18                     |
| SFS-2  | 1.458, 1.258, 0.804    | 0.25                             | 18.8                                                                                 | 0.86                  | 0.11                     | 2.07                  | 0.17                     |
| SFS-3  | 1.828, 2.582, 1.131    | 0.35                             | 18.7                                                                                 | 0.69                  | 0.09                     | 3.45                  | 0.28                     |
| SFS-4  | 2.125, 1.476, 1.321    | 0.41                             | 14.0                                                                                 | 1.17                  | 0.15                     | 3.4                   | 0.27                     |
| SFS-5  | 2.261, 1.957, 1.435    | 0.45                             | 17.1                                                                                 | 1.18                  | 0.16                     | 3.81                  | 0.31                     |

<sup>a</sup>Calculated from sulphur wt. % obtained by CHS analysis as follows, (wt % of sulphur X 1000)/ (100 X 32) = mmol S/ g of SFS sample.

<sup>b</sup>Amount of PrSH in the 1 g of SFS sample was calculated from weight loss (wt. %) observed in 330-430°C temperature range in TGA as follows, (Weight loss in wt % X 1000)/ (100 X 75) = mmol PrSA/ g of SFS sample.

<sup>c</sup>Amount of PrSA in the 1 g of SFS sample was calculated from weight loss (wt. %) observed in 430-580°C temperature range in TGA as follows, (Weight loss in wt % X 1000)/ (100 X 123) = mmol PrSA/ g of SFS sample.

\* There was no significant weight loss in these temperature ranges.
